# Supplementary material
Source: PubMed Central journal article supplement (PMC3770338)

# Supplementary Figure 7A

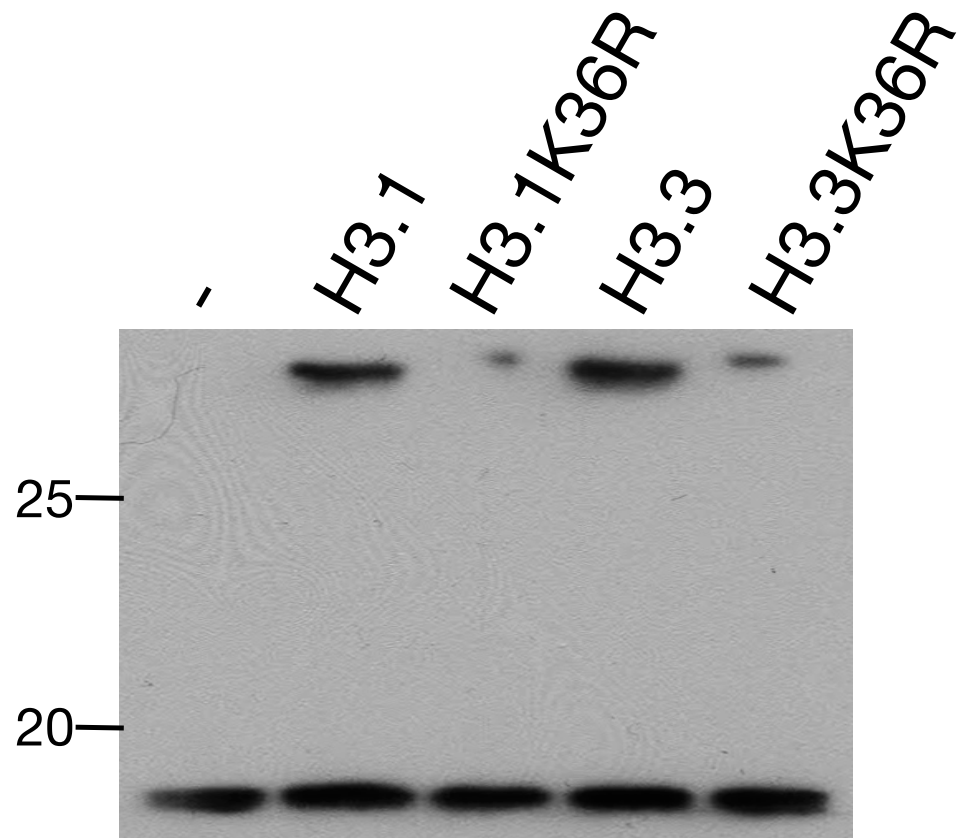

Supplement: emboj2013176dfs7a.pdf [file emboj2013176dfs7a.pdf]
